# Supplementary material
Source: publisher figshare collection journal article supplement (https://frontiersin.figshare.com/ndownloader/files/17853653)
Supplement: Supplementary file 1 [file 17853653]

**Supplement Material, Table ST-1:** Various historical & current Ocean Colour Sensors with their Specifications [**Source:** https://ioccg.org/resources/missions-instruments/current-ocean-colour-sensors/]

| **Sensor / Data Source** | **Agency (Country)** | **Satellite** | **Operating Dates** | **Swath**  **(km)** | **Spatial Resolution**  **(m)** | **No. of Bands** | **Spectral Coverage (nm)** | **Orbit / Equator Crossing Time** |
| --- | --- | --- | --- | --- | --- | --- | --- | --- |
| COCTS  UI  CZI | CNSA/NSOAS  (China) | HY-1C | 07-Sep-18 | 3000  3000  950 | 1100  550  50 | 10  2  4 | 402 - 12,500  345 – 395  433 - 885 | 10:30 |
| GOCI  Geostationary | KARI/KIOST  (South Korea) | COMS | 26-Jun-10 | 2500 | 500 | 8 | 400 - 865 | 8 times / day |
| MODIS-Aqua | NASA (USA) | Aqua (EOS-PM1) | 04-May-02 | 2330 | 250/500/1000 | 36 | 405-14,385 | 13:30 |
| MODIS-Terra | NASA (USA) | Terra (EOS-AM1) | 18-Dec-99 | 2330 | 250/500/1000 | 36 | 405-14,385 | 10:30 |
| [MSI](https://sentinel.esa.int/web/sentinel/missions/sentinel-2/instrument-payload/) | ESA | Sentinel-2A | 23-Jun-15 | 290 | 10/20/60 | 13 | 442-2202 | 10:30 |
| [MSI](https://sentinel.esa.int/web/sentinel/missions/sentinel-2/instrument-payload/) | ESA | [Sentinel-2B](https://sentinel.esa.int/web/sentinel/missions/sentinel-2) | 07-Mar-17 | 290 | 10/20/60 | 13 | 442-2186 | 10:30 |
| [OCM-2](https://ioccg.org/sensor/ocm-2/) | ISRO (India) | [Oceansat-2 (India)](https://ioccg.org/sensors/OCEANSAT_2.pdf) | 23-Sep-09 | 1420 | 360/4000 | 8 | 400 - 900 | 12:00 |
| [OLCI](https://ioccg.org/sensor/olci/) | ESA/EUMETSAT | Sentinel 3A | 16-Feb-16 | 1270 | 300/1200 | 21 | 400 - 1020 | 10:00 |
| [OLCI](https://sentinel.esa.int/web/sentinel/missions/sentinel-3/data-products/olci) | ESA/EUMETSAT | Sentinel 3B | 25-Apr-18 | 1270 | 300/1200 | 21 | 400 - 1020 | 10:00 |
| [SGLI](http://suzaku.eorc.jaxa.jp/GCOM_C/data/data.html) | JAXA (Japan) | GCOM-C | 23-Dec-17 | 1150 - 1400 | 250/1000 | 19 | 375 - 12,500 | 10:30 |
| [SGLI](http://suzaku.eorc.jaxa.jp/GCOM_C/data/data.html) | JAXA (Japan) | GCOM-C | 23-Dec-17 | 1150 - 1400 | 250/1000 | 19 | 375 - 12,500 | 10:30 |
| [VIIRS](https://ioccg.org/sensor/viirs/) | NOAA (USA) | Suomi NPP | 28-Oct-11 | 3000 | 375 / 750 | 22 | 402 - 11,800 | 13:30 |
| [VIIRS](https://ioccg.org/sensor/viirs/) | NOAA/NASA  (USA) | JPSS-1/NOAA-20 | 18-Nov-17 | 3000 | 370 / 740 | 22 | 402 - 11,800 | 13:30 |
| [CZCS](https://ioccg.org/sensor/czcs/) | NASA (USA) | Nimbus-7 (USA) | 24/10/78 - 22/6/86 | 1556 | 825 | 6 | 433-12500 | Polar |
| [CMODIS](https://ioccg.org/sensor/cmodis/) | CNSA (China) | SZ-3 (China) | 25/3/02 - 15/9/02 | 650-700 | 400 | 34 | 403-12,500 | Polar |
| COCTS  CZI | SOA (China) | HY-1A (China) | 15/5/02 - 1/4/04 | 1400  500 | 1100  250 | 10  4 | 402-12,500  420-890 | Polar |
| COCTS  CZI | SOA (China) | HY-1B (China) | 11/4/07 - 02/16 | 3000  500 | 1100  250 | 10  4 | 402-885  433-695 | Polar |
| GLI | NASDA (Japan) | ADEOS-II (Japan) | 14/12/02 - 24/10/03 | 1600 | 250/1000 | 36 | 375-12,500 | Polar |
| [HICO](https://ioccg.org/sensor/hico/) | ONR, DOD and NASA | JEM-EF  Int. Space Stn. | 18/09/09 - 4/12/14 | 50 km  Selected coastal scenes | 100 | 124 | 380 - 1000 | 51.60,  15.8 orbits p/d |
| MERIS | ESA (Europe) | ENVISAT (Europe) | 1/3/02 - 9/5/12 | 1150 | 300/1200 | 15 | 412-1050 | Polar |
| MOS | DLR (Germany) | IRS P3 (India) | 21/3/96 - 31/5/04 | 200 | 500 | 18 | 408-1600 | Polar |
| OCI | NEC (Japan) | ROCSAT-1 (Taiwan) | 27/01/99 - 16/6/04 | 690 | 825 | 6 | 433-12,500 | Polar |
| OCM | ISRO (India) | IRS-P4 (India) | 26/5/99 - 8/8/10 | 1420 | 360/4000 | 8 | 402-885 | Polar |
| OCTS | NASDA (Japan) | ADEOS (Japan) | 17/8/96 - 29/6/97 | 1400 | 700 | 12 | 402-12,500 | Polar |
| OSMI | KARI (Korea) | KOMPSAT-1 / Arirang-1 (Korea) | 20/12/99 - 31/1/08 | 800 | 850 | 6 | 400-900 | Polar |
| POLDER | CNES (France) | ADEOS (Japan) | 17/8/96 - 29/6/97 | 2400 | 6 km | 9 | 443-910 | Polar |
| POLDER-2 | CNES (France) | ADEOS-II (Japan) | 14/12/02 - 24/10/03 | 2400 | 6000 | 9 | 443-910 | Polar |
| POLDER-3 | CNES (France) | Parasol | Dec 2004 - Dec2013 | 2100 | 6000 | 9 | 443-1020 | Polar |
| SeaWiFS | NASA (USA) | OrbView-2 (USA) | 01/08/97 - 14/02/11 | 2806 | 1100 | 8 | 402-885 | Polar |
